# Supplementary material for: Transferrin Saturation/Hepcidin Ratio Discriminates TMPRSS6-Related Iron Refractory Iron Deficiency Anemia from Patients with Multi-Causal Iron Deficiency Anemia
Source: MDPI journal article supplement (doi:10.3390/ijms23031917), 2022-02-08
Supplement: s1 [file s1]

## Supplementary Materials

**Table S1.** Performance of the TSAT/hepcidin ratio in distinguishing IRIDA patients from IDA controls in absence of inflammation and without recent iron therapy.

|                                                                                                          | IRIDA patients (n = 20) versus IDA controls (n = 39) |               |               |             |                       |             |                       |
|----------------------------------------------------------------------------------------------------------|------------------------------------------------------|---------------|---------------|-------------|-----------------------|-------------|-----------------------|
| TSAT/hepcidin ratio                                                                                      | AUC                                                  | 95% CI of AUC | Cut-off value | Sensitivity | 95% CI of Sensitivity | Specificity | 95% CI of Specificity |
| <i>A. Hepcidin &lt;0.5 nM = 0.25 nM</i>                                                                  |                                                      |               |               |             |                       |             |                       |
| Total IRIDA group versus IDA controls                                                                    | 1.000                                                | 1.000-1.000   | <5.6%/nM      | 100%        | 84-100%               | 100%        | 91-100%               |
| Biallelic IRIDA patients versus IDA controls                                                             | 1.000                                                | 1.000-1.000   | <4.3%/nM      | 100%        | 74-100%               | 100%        | 91-100%               |
| Monoallelic IRIDA patients versus IDA controls                                                           | 1.000                                                | 1.000-1.000   | <5.6%/nM      | 100%        | 70-100%               | 100%        | 91-100%               |
| <i>B. Hepcidin &lt;0.5 nM = 0.49 nM</i>                                                                  |                                                      |               |               |             |                       |             |                       |
| Total IRIDA group versus IDA controls                                                                    | 1.000                                                | 1.000-1.000   | <3.9%/nM      | 100%        | 84-100%               | 100%        | 91-100%               |
| Biallelic IRIDA patients versus IDA controls                                                             | 1.000                                                | 1.000-1.000   | <2.6%/nM      | 100%        | 74-100%               | 100%        | 91-100%               |
| Monoallelic IRIDA patients versus IDA controls                                                           | 1.000                                                | 1.000-1.000   | <3.9%/nM      | 100%        | 70-100%               | 100%        | 91-100%               |
| <i>C. Exclusion of IDA control with a monoallelic pathogenic TMPRSS6 variant without IRIDA phenotype</i> | 1.000                                                | 1.000-1.000   | <5.9%/nM      | 100%        | 84-100%               | 100%        | 91-100%               |

Hepcidin levels below the lower limit of detection (<0.5 nM) were imputed with a value of 0.25 nM (A) or with a value of 0.49 nM (B). 95% CI of AUC calculated with SPSS version 22.0 and 95% CI of sensitivity and specificity calculated with GraphPad Prism version 8.4.2. AUC, area under the curve; CI, confidence interval.
